# Supplementary material for: Congenital idiopathic megaesophagus in the German shepherd dog is a sex-differentiated trait and is associated with an intronic variable number tandem repeat in Melanin-Concentrating Hormone Receptor 2
Source: PLoS Genet. 2022 Mar 10;18(3):e1010044. doi: 10.1371/journal.pgen.1010044 (PMC8912139; doi:10.1371/journal.pgen.1010044)
Supplement: S1 Table — (XLSX) [file pgen.1010044.s005.xlsx]

## Sheet: S1Table
Dog ID	Sex	Affection	Pet/Service	WGS data (Y/N)	SNP data (Y/N)	GWAS population (Y/N)	chr12.g.58158449A>G	MCHR2 g.58084223_58084226del	CFRNASEQ_IGNC_Spliced_00025252 g.58216509_58216510ins(6444)	MCHR2 g.58093157T>A	MCHR2 g.58117748_58117780del
10008	F	affected	pet	N	Y	Y	GG	del/del	LINE/LINE	AA	1/1
10009	F	affected	pet	N	Y	Y	GG	del/del	wt/LINE	AA	1/1
10010	F	affected	pet	N	Y	Y	GG	del/del	LINE/LINE	AA	1/1
10012	F	affected	pet	Y	Y	Y	GG	del/del	LINE/LINE	AA	1/1
10013	F	affected	pet	N	Y	Y	GG		LINE/LINE	AA	1/1
10014	F	affected	pet	N	Y	Y	GG		LINE/LINE	AA	1/1
10015	F	affected	pet	N	Y	Y	GG		LINE/LINE	AA	1/1
10017	F	affected	pet	N	Y	Y	GG		LINE/LINE	AA	1/1
10018	F	affected	pet	N	Y	Y	GG		LINE/LINE	AA	1/1
10019	F	affected	pet	N	Y	Y	GG		LINE/LINE	AA	1/1
10020	F	affected	pet	N	Y	Y	GG		LINE/LINE	AA	1/1
10021	F	affected	pet	N	Y	Y	GG		LINE/LINE	AA	1/1
10022	F	affected	pet	N	Y	Y	GG		LINE/LINE	AA	1/1
10023	F	affected	pet	N	Y	Y	GG		LINE/LINE	AA	1/1
10024	F	affected	pet	N	Y	Y	GG		LINE/LINE	AA	1/1
10025	F	affected	pet	N	Y	Y	GG		LINE/LINE	AA	1/1
10026	F	affected	pet	N	Y	Y	GG		LINE/LINE	AA	1/1
10027	F	affected	pet	N	Y	Y	GG		LINE/LINE	AA	1/1
10046	F	affected	pet	N	Y	Y	AG	del/del	wt/wt	AT	1/3
10047	F	affected	pet	N	Y	Y	AG	del/del	wt/LINE	AT	1/3
10048	F	affected	pet	N	Y	Y	AG	del/del	wt/LINE	AT	1/3
10049	F	affected	pet	N	Y	N	AG				1/3
10060	M	affected	pet	N	Y	Y	GG		wt/LINE	AA	1/1
10061	M	affected	pet	N	Y	Y	GG		wt/LINE	AA	1/1
10062	M	affected	pet	N	Y	Y	GG	del/del	LINE/LINE	AA	1/1
10063	M	affected	pet	N	Y	Y	GG	del/del	wt/LINE	AA	1/1
10064	M	affected	pet	N	Y	Y	GG	del/del	LINE/LINE	AA	1/1
10065	M	affected	pet	N	Y	Y	GG	del/del	LINE/LINE	AA	1/1
10066	M	affected	pet	N	Y	Y	GG	del/del	LINE/LINE	AA	1/1
10067	M	affected	pet	N	Y	Y	GG		LINE/LINE	AA	1/1
10068	M	affected	pet	N	Y	Y	GG		LINE/LINE	AA	1/1
10070	M	affected	pet	N	Y	Y	GG		LINE/LINE	AA	1/1
10071	M	affected	pet	N	Y	Y	GG		LINE/LINE	AA	1/1
10072	M	affected	pet	N	Y	Y	GG		LINE/LINE	AA	1/1
10073	M	affected	pet	N	Y	Y	GG		LINE/LINE	AA	1/1
10074	M	affected	pet	N	Y	Y	GG		LINE/LINE	AA	1/1
10075	M	affected	pet	N	Y	Y	GG		wt/LINE	AA	1/1
10076	M	affected	pet	N	Y	Y	GG		LINE/LINE	AA	1/1
10077	M	affected	pet	N	Y	Y	GG		LINE/LINE	AA	1/1
10078	M	affected	pet	N	Y	Y	GG		LINE/LINE	AA	1/1
10079	M	affected	pet	N	Y	Y	GG		LINE/LINE	AA	1/1
10080	M	affected	pet	N	Y	Y	GG		LINE/LINE	AA	1/1
10081	M	affected	pet	N	Y	Y	GG		LINE/LINE	AA	1/1
10082	M	affected	pet	N	Y	Y	GG		LINE/LINE	AA	1/1
10083	M	affected	pet	N	Y	Y	GG		LINE/LINE	AA	1/1
10084	M	affected	pet	N	Y	Y	GG		LINE/LINE	AA	1/1
10085	M	affected	pet	N	Y	Y	GG		LINE/LINE	AA	1/1
10106	M	affected	pet	N	Y	Y	GG	del/wt	LINE/LINE	AT	1/2
10109	M	affected	pet	N	Y	Y	AG		wt/LINE	AT	1/3
10110	M	affected	pet	N	Y	Y	AG		wt/LINE	AT	1/3
10111	M	affected	pet	N	Y	Y	AG		wt/LINE	AT	1/3
10112	M	affected	pet	N	Y	Y	AA		wt/wt	TT	1/3
10120	M	affected	pet	N	Y	Y	AG	wt/wt	wt/LINE	TT	2/3
10121	M	affected	pet	N	Y	Y	AA		wt/wt	TT	3/3
10526	M	affected	pet	N	Y	N	GG
10527	M	affected	pet	N	Y	Y	GG
10528	M	affected	pet	N	Y	Y	GG
10001	F	affected	pet	N	N	N					1/1
10002	F	affected	pet	N	N	N					1/1
10003	F	affected	pet	N	N	N					1/1
10004	F	affected	pet	N	N	N					1/1
10005	F	affected	pet	N	N	N					1/1
10016	F	affected	pet	Y	N	N	GG	del/del	LINE/LINE	AA	1/1
10028	F	affected	pet	N	N	N					1/1
10029	F	affected	pet	N	N	N					1/1
10030	F	affected	pet	N	N	N					1/1
10031	F	affected	pet	N	N	N	GG		wt/LINE	AA	1/1
10032	F	affected	pet	N	N	N	GG		wt/LINE	AA	1/1
10033	F	affected	pet	N	N	N					1/1
10034	F	affected	pet	N	N	N					1/1
10035	F	affected	pet	N	N	N					1/1
10037	F	affected	pet	N	N	N					1/1
10038	F	affected	pet	N	N	N					1/1
10044	F	affected	pet	N	N	N					1/2
10045	F	affected	pet	N	N	N					1/2
10050	F	affected	pet	N	N	N					1/3
10051	F	affected	pet	N	N	N					1/3
10052	F	affected	pet	N	N	N					1/3
10053	F	affected	pet	N	N	N					1/3
10054	F	affected	pet	N	N	N					3/3
10055	M	affected	pet	N	N	N					1/1
10056	M	affected	pet	N	N	N					1/1
10057	M	affected	pet	N	N	N					1/1
10058	M	affected	pet	N	N	N	GG		wt/LINE	AA	1/1
10059	M	affected	pet	N	N	N	GG		wt/LINE	AA	1/1
10086	M	affected	pet	N	N	N					1/1
10087	M	affected	pet	N	N	N					1/1
10088	M	affected	pet	N	N	N					1/1
10089	M	affected	pet	N	N	N					1/1
10090	M	affected	pet	N	N	N					1/1
10091	M	affected	pet	N	N	N					1/1
10092	M	affected	pet	N	N	N					1/1
10093	M	affected	pet	N	N	N					1/1
10094	M	affected	pet	N	N	N					1/1
10095	M	affected	pet	N	N	N					1/1
10096	M	affected	pet	N	N	N					1/1
10097	M	affected	pet	N	N	N					1/1
10098	M	affected	pet	N	N	N					1/1
10105	M	affected	pet	N	N	N					1/2
10107	M	affected	pet	N	N	N					1/3
10108	M	affected	pet	N	N	N					1/3
10113	M	affected	pet	N	N	N					1/3
10114	M	affected	pet	N	N	N					1/3
10115	M	affected	pet	N	N	N					1/3
10116	M	affected	pet	N	N	N					1/3
10117	M	affected	pet	N	N	N					1/3
10118	M	affected	pet	N	N	N					1/3
10119	M	affected	pet	N	N	N					1/3
10123	F	unaffected	pet	N	Y	Y	GG		wt/LINE	AA	1/1
10124	F	unaffected	pet	N	Y	Y	GG	del/del	LINE/LINE	AA	1/1
10125	F	unaffected	pet	N	Y	Y	AG		wt/LINE	AT	1/1
10126	F	unaffected	pet	N	Y	Y	GG		LINE/LINE	AA	1/1
10127	F	unaffected	pet	N	Y	Y	GG		LINE/LINE	AA	1/1
10207	F	unaffected	pet	N	Y	Y	GG	del/wt	wt/LINE	AT	1/2
10213	F	unaffected	pet	N	Y	Y	AG		wt/wt	AT	1/3
10214	F	unaffected	pet	N	Y	Y	AG	del/del	wt/LINE	AT	1/3
10215	F	unaffected	pet	N	Y	Y	AG	del/del	wt/LINE	AT	1/3
10216	F	unaffected	pet	N	Y	Y	AG		wt/LINE	AT	1/3
10217	F	unaffected	pet	N	Y	Y	AG		wt/LINE	AT	1/3
10218	F	unaffected	pet	N	Y	Y	AG		wt/LINE	AT	1/3
10219	F	unaffected	pet	N	Y	Y	AG		wt/LINE	AT	1/3
10220	F	unaffected	pet	N	Y	Y	AG	del/del	wt/LINE	AT	1/3
10221	F	unaffected	pet	N	Y	Y	AG	del/del	wt/LINE	AT	1/3
10222	F	unaffected	pet	N	Y	Y	AG		wt/LINE	AT	1/3
10223	F	unaffected	pet	N	Y	Y	AG		wt/LINE	AT	1/3
10224	F	unaffected	pet	N	Y	Y	AG		wt/LINE	AT	1/3
10225	F	unaffected	pet	N	Y	Y	AG		wt/LINE	AT	1/3
10226	F	unaffected	pet	N	Y	Y	AG		wt/LINE	AT	1/3
10227	F	unaffected	pet	N	Y	Y	AG		wt/LINE	AT	1/3
10228	F	unaffected	pet	N	Y	Y	AG		wt/LINE	AT	1/3
10230	F	unaffected	pet	N	Y	Y	AA		wt/wt	TT	1/3
10231	F	unaffected	pet	N	Y	Y	AG		wt/LINE	AT	1/3
10232	F	unaffected	pet	N	Y	Y	AA		wt/wt	TT	1/3
10233	F	unaffected	pet	N	Y	Y	AA		wt/wt	TT	1/3
10234	F	unaffected	pet	N	Y	Y	AG		wt/LINE	AT	1/3
10314	F	unaffected	pet	N	Y	Y	AA	wt/wt	wt/wt	TT	2/3
10322	F	unaffected	pet	N	Y	Y	AA		wt/wt	TT	3/3
10323	F	unaffected	pet	N	Y	Y	AA		wt/wt	TT	3/3
10324	F	unaffected	pet	N	Y	Y	AA		wt/wt	TT	3/3
10325	F	unaffected	pet	N	Y	Y	AA		wt/wt	TT	3/3
10362	M	unaffected	pet	N	Y	Y	GG		wt/LINE	AA	1/1
10363	M	unaffected	pet	N	Y	Y	GG	del/del	LINE/LINE	AA	1/1
10364	M	unaffected	pet	N	Y	Y	GG		LINE/LINE	AA	1/1
10365	M	unaffected	pet	N	Y	Y	AG		wt/LINE	AT	1/1
10422	M	unaffected	pet	N	Y	Y	AG		wt/wt	AT	1/3
10423	M	unaffected	pet	N	Y	Y	AG	del/del	wt/LINE	AT	1/3
10424	M	unaffected	pet	N	Y	Y	AG	del/del	wt/LINE	AT	1/3
10425	M	unaffected	pet	N	Y	Y	AG	del/del	wt/LINE	AT	1/3
10426	M	unaffected	pet	N	Y	Y	AG		wt/LINE	AT	1/3
10427	M	unaffected	pet	N	Y	Y	AG		wt/LINE	AT	1/3
10428	M	unaffected	pet	N	Y	Y	AG		wt/LINE	AT	1/3
10430	M	unaffected	pet	N	Y	Y	AG		wt/wt	AT	1/3
10431	M	unaffected	pet	N	Y	Y	AG		wt/LINE	AT	1/3
10493	M	unaffected	pet	N	Y	Y	AA		wt/wt	TT	3/3
10494	M	unaffected	pet	N	Y	Y	AA		wt/wt	TT	3/3
10495	M	unaffected	pet	N	Y	Y	AA		wt/wt	TT	3/3
10529	F	unaffected	pet	N	Y	Y	GG
10530	M	unaffected	pet	N	Y	Y	AA
10122	F	unaffected	pet	N	N	N					1/1
10129	F	unaffected	pet	N	N	N					1/1
10130	F	unaffected	pet	N	N	N					1/1
10131	F	unaffected	pet	N	N	N					1/1
10132	F	unaffected	pet	N	N	N					1/1
10133	F	unaffected	pet	N	N	N					1/1
10134	F	unaffected	pet	N	N	N					1/1
10135	F	unaffected	pet	N	N	N					1/1
10136	F	unaffected	pet	N	N	N					1/1
10137	F	unaffected	pet	N	N	N					1/1
10138	F	unaffected	pet	N	N	N					1/1
10139	F	unaffected	pet	N	N	N					1/1
10140	F	unaffected	pet	N	N	N					1/1
10141	F	unaffected	pet	N	N	N					1/1
10142	F	unaffected	pet	N	N	N					1/1
10143	F	unaffected	pet	N	N	N					1/1
10144	F	unaffected	pet	N	N	N					1/1
10145	F	unaffected	pet	N	N	N					1/1
10146	F	unaffected	pet	N	N	N					1/1
10147	F	unaffected	pet	N	N	N					1/1
10148	F	unaffected	pet	N	N	N					1/1
10170	F	unaffected	pet	N	N	N					1/1
10171	F	unaffected	pet	N	N	N					1/1
10172	F	unaffected	pet	N	N	N					1/1
10173	F	unaffected	pet	N	N	N					1/1
10174	F	unaffected	pet	N	N	N					1/1
10175	F	unaffected	pet	N	N	N					1/1
10176	F	unaffected	pet	N	N	N					1/1
10177	F	unaffected	pet	N	N	N					1/1
10178	F	unaffected	pet	N	N	N					1/1
10179	F	unaffected	pet	N	N	N					1/1
10180	F	unaffected	pet	N	N	N					1/1
10181	F	unaffected	pet	N	N	N					1/1
10182	F	unaffected	pet	N	N	N					1/1
10183	F	unaffected	pet	N	N	N					1/1
10184	F	unaffected	pet	N	N	N					1/1
10185	F	unaffected	pet	N	N	N					1/1
10186	F	unaffected	pet	N	N	N					1/1
10187	F	unaffected	pet	N	N	N					1/1
10188	F	unaffected	pet	N	N	N					1/1
10189	F	unaffected	pet	N	N	N					1/1
10190	F	unaffected	pet	N	N	N					1/1
10191	F	unaffected	pet	N	N	N					1/1
10192	F	unaffected	pet	N	N	N					1/1
10193	F	unaffected	pet	N	N	N					1/1
10194	F	unaffected	pet	N	N	N					1/1
10195	F	unaffected	pet	N	N	N					1/1
10196	F	unaffected	pet	N	N	N					1/1
10197	F	unaffected	pet	N	N	N					1/1
10198	F	unaffected	pet	N	N	N					1/1
10199	F	unaffected	pet	N	N	N					1/1
10200	F	unaffected	pet	N	N	N					1/1
10201	F	unaffected	pet	N	N	N					1/1
10202	F	unaffected	pet	N	N	N					1/1
10203	F	unaffected	pet	N	N	N					1/1
10204	F	unaffected	pet	N	N	N					1/1
10205	F	unaffected	pet	N	N	N					1/1
10206	F	unaffected	pet	N	N	N					1/1
10208	F	unaffected	pet	N	N	N					1/2
10212	F	unaffected	pet	N	N	N					1/2
10235	F	unaffected	pet	N	N	N					1/3
10236	F	unaffected	pet	N	N	N					1/3
10237	F	unaffected	pet	N	N	N					1/3
10238	F	unaffected	pet	N	N	N					1/3
10239	F	unaffected	pet	N	N	N					1/3
10240	F	unaffected	pet	N	N	N					1/3
10241	F	unaffected	pet	N	N	N					1/3
10242	F	unaffected	pet	N	N	N					1/3
10243	F	unaffected	pet	N	N	N					1/3
10244	F	unaffected	pet	N	N	N					1/3
10245	F	unaffected	pet	N	N	N					1/3
10246	F	unaffected	pet	N	N	N					1/3
10247	F	unaffected	pet	N	N	N					1/3
10248	F	unaffected	pet	N	N	N					1/3
10249	F	unaffected	pet	N	N	N					1/3
10250	F	unaffected	pet	N	N	N					1/3
10251	F	unaffected	pet	N	N	N					1/3
10252	F	unaffected	pet	N	N	N					1/3
10253	F	unaffected	pet	N	N	N					1/3
10254	F	unaffected	pet	N	N	N					1/3
10255	F	unaffected	pet	N	N	N					1/3
10256	F	unaffected	pet	N	N	N					1/3
10279	F	unaffected	pet	N	N	N					1/3
10281	F	unaffected	pet	N	N	N					1/3
10282	F	unaffected	pet	N	N	N					1/3
10283	F	unaffected	pet	N	N	N					1/3
10284	F	unaffected	pet	N	N	N					1/3
10285	F	unaffected	pet	N	N	N					1/3
10286	F	unaffected	pet	N	N	N					1/3
10287	F	unaffected	pet	N	N	N					1/3
10288	F	unaffected	pet	N	N	N					1/3
10289	F	unaffected	pet	N	N	N					1/3
10290	F	unaffected	pet	N	N	N					1/3
10291	F	unaffected	pet	N	N	N					1/3
10292	F	unaffected	pet	N	N	N					1/3
10293	F	unaffected	pet	N	N	N					1/3
10294	F	unaffected	pet	N	N	N					1/3
10295	F	unaffected	pet	N	N	N					1/3
10296	F	unaffected	pet	N	N	N					1/3
10297	F	unaffected	pet	N	N	N					1/3
10298	F	unaffected	pet	N	N	N					1/3
10299	F	unaffected	pet	N	N	N					1/3
10300	F	unaffected	pet	N	N	N					1/3
10301	F	unaffected	pet	N	N	N					1/3
10302	F	unaffected	pet	N	N	N					1/3
10303	F	unaffected	pet	N	N	N					1/3
10304	F	unaffected	pet	N	N	N					1/3
10305	F	unaffected	pet	N	N	N					1/3
10306	F	unaffected	pet	N	N	N					1/3
10307	F	unaffected	pet	N	N	N					1/3
10308	F	unaffected	pet	N	N	N					1/3
10309	F	unaffected	pet	N	N	N					1/3
10310	F	unaffected	pet	N	N	N					1/3
10311	F	unaffected	pet	N	N	N					1/3
10312	F	unaffected	pet	N	N	N					1/3
10313	F	unaffected	pet	N	N	N					1/3
10315	F	unaffected	pet	N	N	N					2/3
10316	F	unaffected	pet	N	N	N					2/3
10326	F	unaffected	pet	N	N	N					3/3
10327	F	unaffected	pet	N	N	N					3/3
10328	F	unaffected	pet	N	N	N					3/3
10329	F	unaffected	pet	N	N	N					3/3
10330	F	unaffected	pet	N	N	N					3/3
10331	F	unaffected	pet	N	N	N					3/3
10332	F	unaffected	pet	N	N	N					3/3
10333	F	unaffected	pet	N	N	N					3/3
10347	F	unaffected	pet	N	N	N					3/3
10348	F	unaffected	pet	N	N	N					3/3
10349	F	unaffected	pet	N	N	N					3/3
10350	F	unaffected	pet	N	N	N					3/3
10351	F	unaffected	pet	N	N	N					3/3
10352	F	unaffected	pet	N	N	N					3/3
10353	F	unaffected	pet	N	N	N					3/3
10354	F	unaffected	pet	N	N	N					3/3
10355	F	unaffected	pet	N	N	N					3/3
10356	F	unaffected	pet	N	N	N					3/3
10357	F	unaffected	pet	N	N	N					3/3
10358	F	unaffected	pet	N	N	N					3/3
10359	F	unaffected	pet	N	N	N					3/3
10360	F	unaffected	pet	N	N	N					3/3
10361	F	unaffected	pet	N	N	N					3/3
10366	M	unaffected	pet	N	N	N					1/1
10367	M	unaffected	pet	N	N	N					1/1
10368	M	unaffected	pet	N	N	N					1/1
10369	M	unaffected	pet	N	N	N					1/1
10370	M	unaffected	pet	N	N	N					1/1
10371	M	unaffected	pet	N	N	N					1/1
10372	M	unaffected	pet	N	N	N					1/1
10373	M	unaffected	pet	N	N	N					1/1
10374	M	unaffected	pet	N	N	N					1/1
10375	M	unaffected	pet	N	N	N					1/1
10376	M	unaffected	pet	N	N	N					1/1
10377	M	unaffected	pet	N	N	N					1/1
10378	M	unaffected	pet	N	N	N					1/1
10379	M	unaffected	pet	N	N	N					1/1
10393	M	unaffected	pet	N	N	N					1/1
10394	M	unaffected	pet	N	N	N					1/1
10395	M	unaffected	pet	N	N	N					1/1
10396	M	unaffected	pet	N	N	N					1/1
10397	M	unaffected	pet	N	N	N					1/1
10398	M	unaffected	pet	N	N	N					1/1
10399	M	unaffected	pet	N	N	N					1/1
10400	M	unaffected	pet	N	N	N					1/1
10401	M	unaffected	pet	N	N	N					1/1
10402	M	unaffected	pet	N	N	N					1/1
10403	M	unaffected	pet	N	N	N					1/1
10404	M	unaffected	pet	N	N	N					1/1
10405	M	unaffected	pet	N	N	N					1/1
10406	M	unaffected	pet	N	N	N					1/1
10407	M	unaffected	pet	N	N	N					1/1
10408	M	unaffected	pet	N	N	N					1/1
10409	M	unaffected	pet	N	N	N					1/1
10410	M	unaffected	pet	N	N	N					1/1
10411	M	unaffected	pet	N	N	N					1/1
10412	M	unaffected	pet	N	N	N					1/2
10419	M	unaffected	pet	N	N	N					1/2
10420	M	unaffected	pet	N	N	N					1/2
10421	M	unaffected	pet	N	N	N					1/2
10432	M	unaffected	pet	N	N	N					1/3
10433	M	unaffected	pet	N	N	N					1/3
10434	M	unaffected	pet	N	N	N					1/3
10435	M	unaffected	pet	N	N	N					1/3
10436	M	unaffected	pet	N	N	N					1/3
10437	M	unaffected	pet	N	N	N					1/3
10438	M	unaffected	pet	N	N	N					1/3
10439	M	unaffected	pet	N	N	N					1/3
10440	M	unaffected	pet	N	N	N					1/3
10441	M	unaffected	pet	N	N	N					1/3
10442	M	unaffected	pet	N	N	N					1/3
10443	M	unaffected	pet	N	N	N					1/3
10444	M	unaffected	pet	N	N	N					1/3
10453	M	unaffected	pet	N	N	N					1/3
10454	M	unaffected	pet	N	N	N					1/3
10455	M	unaffected	pet	N	N	N					1/3
10456	M	unaffected	pet	N	N	N					1/3
10457	M	unaffected	pet	N	N	N					1/3
10458	M	unaffected	pet	N	N	N					1/3
10459	M	unaffected	pet	N	N	N					1/3
10460	M	unaffected	pet	N	N	N					1/3
10461	M	unaffected	pet	N	N	N					1/3
10462	M	unaffected	pet	N	N	N					1/3
10463	M	unaffected	pet	N	N	N					1/3
10464	M	unaffected	pet	N	N	N					1/3
10465	M	unaffected	pet	N	N	N					1/3
10466	M	unaffected	pet	N	N	N					1/3
10467	M	unaffected	pet	N	N	N					1/3
10468	M	unaffected	pet	N	N	N					1/3
10469	M	unaffected	pet	N	N	N					1/3
10470	M	unaffected	pet	N	N	N					1/3
10471	M	unaffected	pet	N	N	N					1/3
10472	M	unaffected	pet	N	N	N					1/3
10473	M	unaffected	pet	N	N	N					1/3
10474	M	unaffected	pet	N	N	N					1/3
10475	M	unaffected	pet	N	N	N					1/3
10476	M	unaffected	pet	N	N	N					1/3
10477	M	unaffected	pet	N	N	N					1/3
10478	M	unaffected	pet	N	N	N					1/3
10479	M	unaffected	pet	N	N	N					1/3
10480	M	unaffected	pet	N	N	N					1/3
10481	M	unaffected	pet	N	N	N					1/3
10482	M	unaffected	pet	N	N	N					1/3
10483	M	unaffected	pet	N	N	N					1/3
10484	M	unaffected	pet	N	N	N					1/3
10485	M	unaffected	pet	N	N	N					1/3
10486	M	unaffected	pet	N	N	N					1/3
10487	M	unaffected	pet	N	N	N					1/3
10488	M	unaffected	pet	N	N	N					1/3
10489	M	unaffected	pet	Y	N	N	AA	wt/wt	wt/wt	TT	2/2
10490	M	unaffected	pet	N	N	N					2/3
10496	M	unaffected	pet	N	N	N					3/3
10497	M	unaffected	pet	N	N	N					3/3
10498	M	unaffected	pet	N	N	N					3/3
10499	M	unaffected	pet	N	N	N					3/3
10500	M	unaffected	pet	N	N	N					3/3
10507	M	unaffected	pet	N	N	N					3/3
10508	M	unaffected	pet	N	N	N					3/3
10509	M	unaffected	pet	N	N	N					3/3
10510	M	unaffected	pet	N	N	N					3/3
10511	M	unaffected	pet	N	N	N					3/3
10512	M	unaffected	pet	N	N	N					3/3
10513	M	unaffected	pet	N	N	N					3/3
10514	M	unaffected	pet	N	N	N					3/3
10515	M	unaffected	pet	N	N	N					3/3
10516	M	unaffected	pet	N	N	N					3/3
10517	M	unaffected	pet	N	N	N					3/3
10518	M	unaffected	pet	N	N	N					3/3
10519	M	unaffected	pet	N	N	N					3/3
10520	M	unaffected	pet	N	N	N					3/3
10521	M	unaffected	pet	N	N	N					3/3
10522	M	unaffected	pet	N	N	N					3/3
10523	M	unaffected	pet	N	N	N					3/3
10524	M	unaffected	pet	N	N	N					3/3
10525	M	unaffected	pet	N	N	N					3/3
10006	F	affected	service	N	Y	Y	GG	del/del	wt/LINE	AA	1/1
10007	F	affected	service	N	Y	Y	GG	del/del	wt/LINE	AA	1/1
10011	F	affected	service	Y	Y	Y	GG	del/del	LINE/LINE	AA	1/1
10069	M	affected	service	N	Y	Y	AG		wt/LINE	AA	1/1
10036	F	affected	service	N	N	N	AG		wt/LINE	AA	1/1
10039	F	affected	service	N	N	N					1/1
10040	F	affected	service	N	N	N					1/1
10041	F	affected	service	N	N	N					1/1
10042	F	affected	service	N	N	N					1/1
10043	F	affected	service	N	N	N					1/1
10099	M	affected	service	N	N	N					1/1
10100	M	affected	service	N	N	N					1/1
10101	M	affected	service	N	N	N					1/1
10102	M	affected	service	N	N	N					1/1
10103	M	affected	service	N	N	N					1/1
10104	M	affected	service	N	N	N					1/1
10128	F	unaffected	service	N	Y	Y	GG		LINE/LINE	AA	1/1
10229	F	unaffected	service	N	Y	Y	AG		wt/LINE	AT	1/3
10429	M	unaffected	service	N	Y	Y	AG	del/del	wt/LINE	AT	1/3
10149	F	unaffected	service	N	N	N					1/1
10150	F	unaffected	service	N	N	N					1/1
10151	F	unaffected	service	N	N	N					1/1
10152	F	unaffected	service	N	N	N					1/1
10153	F	unaffected	service	N	N	N					1/1
10154	F	unaffected	service	N	N	N					1/1
10155	F	unaffected	service	N	N	N					1/1
10156	F	unaffected	service	N	N	N					1/1
10157	F	unaffected	service	N	N	N					1/1
10158	F	unaffected	service	N	N	N					1/1
10159	F	unaffected	service	N	N	N					1/1
10160	F	unaffected	service	N	N	N					1/1
10161	F	unaffected	service	N	N	N					1/1
10162	F	unaffected	service	N	N	N					1/1
10163	F	unaffected	service	N	N	N					1/1
10164	F	unaffected	service	N	N	N	AG		wt/LINE	AA	1/1
10165	F	unaffected	service	N	N	N					1/1
10166	F	unaffected	service	N	N	N					1/1
10167	F	unaffected	service	N	N	N					1/1
10168	F	unaffected	service	N	N	N					1/1
10169	F	unaffected	service	N	N	N					1/1
10209	F	unaffected	service	N	N	N					1/2
10210	F	unaffected	service	N	N	N					1/2
10211	F	unaffected	service	N	N	N					1/2
10257	F	unaffected	service	N	N	N					1/3
10258	F	unaffected	service	N	N	N					1/3
10259	F	unaffected	service	N	N	N					1/3
10260	F	unaffected	service	N	N	N					1/3
10261	F	unaffected	service	N	N	N					1/3
10262	F	unaffected	service	N	N	N					1/3
10263	F	unaffected	service	N	N	N					1/3
10264	F	unaffected	service	N	N	N					1/3
10265	F	unaffected	service	N	N	N					1/3
10266	F	unaffected	service	N	N	N					1/3
10267	F	unaffected	service	N	N	N					1/3
10268	F	unaffected	service	N	N	N					1/3
10269	F	unaffected	service	N	N	N					1/3
10270	F	unaffected	service	N	N	N					1/3
10271	F	unaffected	service	N	N	N					1/3
10272	F	unaffected	service	N	N	N					1/3
10273	F	unaffected	service	N	N	N					1/3
10274	F	unaffected	service	N	N	N					1/3
10275	F	unaffected	service	N	N	N					1/3
10276	F	unaffected	service	N	N	N					1/3
10277	F	unaffected	service	N	N	N					1/3
10278	F	unaffected	service	N	N	N					1/3
10280	F	unaffected	service	N	N	N					1/3
10317	F	unaffected	service	N	N	N					2/3
10318	F	unaffected	service	N	N	N					2/3
10319	F	unaffected	service	N	N	N					2/3
10320	F	unaffected	service	N	N	N					2/3
10321	F	unaffected	service	N	N	N					2/3
10334	F	unaffected	service	N	N	N					3/3
10335	F	unaffected	service	N	N	N					3/3
10336	F	unaffected	service	N	N	N					3/3
10337	F	unaffected	service	N	N	N					3/3
10338	F	unaffected	service	N	N	N					3/3
10339	F	unaffected	service	N	N	N					3/3
10340	F	unaffected	service	N	N	N					3/3
10341	F	unaffected	service	N	N	N					3/3
10342	F	unaffected	service	N	N	N					3/3
10343	F	unaffected	service	N	N	N					3/3
10344	F	unaffected	service	N	N	N					3/3
10345	F	unaffected	service	N	N	N					3/3
10346	F	unaffected	service	N	N	N					3/3
10380	M	unaffected	service	N	N	N					1/1
10381	M	unaffected	service	N	N	N					1/1
10382	M	unaffected	service	N	N	N					1/1
10383	M	unaffected	service	N	N	N					1/1
10384	M	unaffected	service	N	N	N					1/1
10385	M	unaffected	service	N	N	N					1/1
10386	M	unaffected	service	N	N	N					1/1
10387	M	unaffected	service	N	N	N					1/1
10388	M	unaffected	service	N	N	N					1/1
10389	M	unaffected	service	N	N	N					1/1
10390	M	unaffected	service	N	N	N					1/1
10391	M	unaffected	service	N	N	N					1/1
10392	M	unaffected	service	N	N	N					1/1
10413	M	unaffected	service	N	N	N					1/2
10414	M	unaffected	service	N	N	N					1/2
10415	M	unaffected	service	N	N	N					1/2
10416	M	unaffected	service	N	N	N					1/2
10417	M	unaffected	service	N	N	N					1/2
10418	M	unaffected	service	N	N	N					1/2
10445	M	unaffected	service	N	N	N	AA		wt/wt	AT	1/3
10446	M	unaffected	service	N	N	N					1/3
10447	M	unaffected	service	N	N	N					1/3
10448	M	unaffected	service	N	N	N					1/3
10449	M	unaffected	service	N	N	N					1/3
10450	M	unaffected	service	N	N	N					1/3
10451	M	unaffected	service	N	N	N					1/3
10452	M	unaffected	service	N	N	N					1/3
10491	M	unaffected	service	N	N	N					2/3
10492	M	unaffected	service	N	N	N					2/3
10501	M	unaffected	service	N	N	N					3/3
10502	M	unaffected	service	N	N	N					3/3
10503	M	unaffected	service	N	N	N					3/3
10504	M	unaffected	service	N	N	N					3/3
10505	M	unaffected	service	N	N	N					3/3
10506	M	unaffected	service	N	N	N					3/3
